# Supplementary material
Source: ML conference proceedings conference paper supplement (https://proceedings.neurips.cc/paper_files/paper/2021/hash/c82836ed448c41094025b4a872c5341e-Abstract.html)
Supplement: Supplementary file 1 [file c82836ed448c41094025b4a872c5341e-Supplemental.pdf]

**Estimation of (II):** We note that

$$\begin{aligned}
\|V_X^T [(\text{Id} - \mathcal{A}^* \mathcal{A})(XX^T - U_t U_t^T)] U_t U_t^T\| &\leq \|(\text{Id} - \mathcal{A}^* \mathcal{A})(XX^T - U_t U_t^T)\| \|U_t\|^2 \\
&\lesssim \|(\text{Id} - \mathcal{A}^* \mathcal{A})(XX^T - U_t U_t^T)\| \|X\|^2 \\
&\lesssim c\sigma_{\min}^2(X) \|XX^T - U_t U_t^T\| \\
&\lesssim c\sigma_{\min}^2(X) (\|V_X^T(XX^T - U_t U_t^T)\| + \|U_t W_{t,\perp} W_{t,\perp}^T U_t\|).
\end{aligned}$$

In the second inequality we used the assumption  $\|U\| \leq 3\|X\|$  and in the third inequality we used assumption (48). In the fourth inequality we applied Lemma B.4. Hence, by choosing the constant  $c > 0$  small enough, we obtain that

$$\|V_X^T [(\text{Id} - \mathcal{A}^* \mathcal{A})(XX^T - U_t U_t^T)] U_t U_t^T\| \leq \frac{1}{1000} \sigma_{\min}^2(X) (\|V_X^T(XX^T - U_t U_t^T)\| + \|U_t W_{t,\perp} W_{t,\perp}^T U_t\|).$$

**Estimation of (III):** In the analogous way as in the estimation of (II) we derive that

$$\|V_X^T U_t U_t^T [(\text{Id} - \mathcal{A}^* \mathcal{A})(XX^T - U_t U_t^T)]\| \leq \frac{1}{1000} \sigma_{\min}^2(X) (\|V_X^T(XX^T - U_t U_t^T)\| + \|U_t W_{t,\perp} W_{t,\perp}^T U_t\|).$$

**Estimation of (IV):** We note that it follows from submultiplicativity of the spectral norm that

$$\begin{aligned}
\|V_X^T U_t U_t^T (XX^T - U_t U_t^T) U_t U_t^T\| &\leq \|U\|^4 \|XX^T - U_t U_t^T\| \\
&\lesssim \|X\|^4 \|XX^T - U_t U_t^T\| \\
&\lesssim \|X\|^4 \|V_X^T(XX^T - U_t U_t^T)\| + \|X\|^4 \|U_t W_{t,\perp}\|^2,
\end{aligned}$$

where in the second line we used the assumption  $\|U_t\| \leq 3\|X\|$ . In the third line we used Lemma B.4. Then using the assumption  $\mu \leq c\kappa^{-2}\|X\|^{-2}$  it follows that

$$\mu^2 \|V_X^T U_t U_t^T (XX^T - U_t U_t^T) U_t U_t^T\| \leq \frac{\mu}{200} \sigma_{\min}^2(X) \|V_X^T(XX^T - U_t U_t^T)\| + \mu \frac{\sigma_{\min}^2(X)}{1000} \|U_t W_{t,\perp} W_{t,\perp}^T U_t\|.$$

**Estimation of (V):** We first note that

$$\begin{aligned}
\|(\mathcal{A}^* \mathcal{A})(XX^T - U_t U_t^T)\| &\leq \|XX^T - U_t U_t^T\| + \|[(\text{Id} - \mathcal{A}^* \mathcal{A})(XX^T - U_t U_t^T)]\| \\
&\leq (1 + c\kappa^{-2}) \|XX^T - U_t U_t^T\| \\
&\leq 2\|XX^T - U_t U_t^T\|,
\end{aligned}$$

where we have used Assumption (48). In a similar manner, again using Assumption (48), we can show that

$$\|(\mathcal{A}^* \mathcal{A})(XX^T - U_t U_t^T)\| \leq 2\|XX^T - U_t U_t^T\| \leq 2(\|X\|^2 + \|U_t\|^2).$$

Hence, it follows that

$$\begin{aligned}
&\|V_X^T [(\mathcal{A}^* \mathcal{A})(XX^T - U_t U_t^T)] U_t U_t^T [(\mathcal{A}^* \mathcal{A})(XX^T - U_t U_t^T)]\| \\
&\leq \|[(\mathcal{A}^* \mathcal{A})(XX^T - U_t U_t^T)]\| \|U_t\|^2 \|(\mathcal{A}^* \mathcal{A})(XX^T - U_t U_t^T)\| \\
&\lesssim \|XX^T - U_t U_t^T\| \|U_t\|^2 \|(\mathcal{A}^* \mathcal{A})(XX^T - U_t U_t^T)\| \\
&\lesssim \|XX^T - U_t U_t^T\| \|U_t\|^2 (\|X\|^2 + \|U_t\|^2) \\
&\lesssim \|XX^T - U_t U_t^T\| \|X\|^4 \\
&\lesssim (\|V_X^T(XX^T - U_t U_t^T)\| + \|U_t W_{t,\perp} W_{t,\perp}^T U_t\|) \|X\|^4,
\end{aligned}$$

where in the third and fourth line we used the estimates from above. The fifth line is due to assumption  $\|U_t\| \leq 3\|X\|$ . In the last line we used Lemma B.4. Hence, it follows that

$$\begin{aligned}
&\mu^2 \|V_X^T [(\mathcal{A}^* \mathcal{A})(XX^T - U_t U_t^T)] U_t U_t^T [(\mathcal{A}^* \mathcal{A})(XX^T - U_t U_t^T)]\| \\
&\leq \frac{\mu}{1000} \sigma_{\min}^2(X) \|V_X^T(XX^T - U_t U_t^T)\| + \frac{\mu}{400} \sigma_{\min}^2(X) \|U_t W_{t,\perp} W_{t,\perp}^T U_t\|,
\end{aligned}$$

where the last inequality is due to the assumption  $\mu \leq c\kappa^{-2}\|X\|^{-2}$  for a sufficiently small constant  $c > 0$ .

**Combining the estimates:** By combining the estimates, it follows that

$$\|V_X^T (XX^T - U_{t+1}U_{t+1}^T)\| \leq \left(1 - \frac{\mu}{200}\sigma_{\min}^2(X)\right) \|V_X^T (XX^T - U_tU_t^T)\| + \mu \frac{\sigma_{\min}^2(X)}{100} \|U_t W_{t,\perp} W_{t,\perp}^T U_t^T\|,$$

which finishes the proof.  $\square$
